# Supplementary material for: Blunt dopamine transmission due to decreased GDNF in the PFC evokes cognitive impairment in Parkinson’s disease
Source: PubMed Central journal article supplement — Neural Regen Res. 2022 Oct 10;18(5):1107–17. doi: 10.4103/1673-5374.355816 (PMC9827775; doi:10.4103/1673-5374.355816), 2022-10-10
Supplement: NRR-18-1107_Suppl3.pdf [file NRR-18-1107_Suppl3.pdf]

## OPEN PEER REVIEW REPORT 2

**Name of journal:** Neural Regeneration Research

**Manuscript NO:** NRR-D-22-00145

**Title:** Decreased GDNF in the PFC potentially evokes the cognitive impairment of Parkinson disease by blunting dopamine transmission

**Reviewer's Name:** Leonardo Cocito

**Reviewer's country:** Italy

### COMMENTS TO AUTHORS

The paper is aimed to show the role of a deficit of glial cell derived neurotrophic factor (GDNF) as a possible cause of cognitive impairment in Parkinson disease (PD).

The paper is very long, also because it includes both a clinical study on PD patients and an experimental animal study. The point has been addressed by several tests, to show the relationships of decreased GDNF and cognitive status.

The authors report quite a lot of data, which renders the paper very hard to read. I would suggest that human and experimental data are reported separately; moreover, a considerable reduction of size of the paper should be recommended.
